# Supplementary material for: Modification of Sn-Beta zeolite: characterization of acidic/basic properties and catalytic performance in Baeyer–Villiger oxidation
Source: Royal Society of Chemistry journal article supplement (doi:10.1039/c6cy00532b), 2016-01-01
Supplement: c6cy00532b1.pdf [file c6cy00532b1.pdf]

## *Supporting information*

Modification of Sn-Beta zeolite: Characterization of acido-basic properties  
and catalytic performance in Baeyer-Villiger oxidation

Ryoichi Otomo,<sup>a,b</sup> Ryota Kosugi,<sup>a</sup> Yuichi Kamiya,<sup>b</sup> Takashi Tatsumi,<sup>a</sup> and Toshiyuki  
Yokoi<sup>\*,a</sup>

<sup>a</sup>Chemical Resources Laboratory, Tokyo Institute of Technology, 4259 Nagatsuta, Midori-ku,  
Yokohama 226-8503, Japan

<sup>b</sup>Faculty of Environmental Earth Science, Hokkaido University, Nishi 5, Kita 10, Kita-ku, Sapporo  
060-0810, Japan

*\*Corresponding author: Toshiyuki Yokoi*

Tel: +81-45-924-5265, Fax: +81-45-924-5282, E-mail: yokoi@cat.res.titech.ac.jp

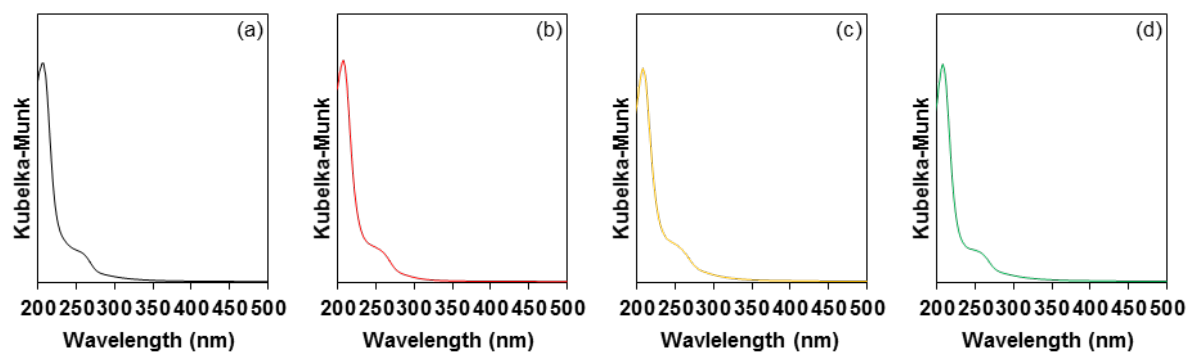

**Fig. S1** UV-Vis spectra of pre-treated Sn-Beta samples. (a) Sn-Beta, (b) Sn-Beta-Li-L, (c) Sn-Beta-Na-L, and (d) Sn-Beta-Cs-L. The samples were pretreated *in vacuo* at 400 °C for 1 h. The spectra were normalized by adjusting the peak intensity at 210 nm similar.

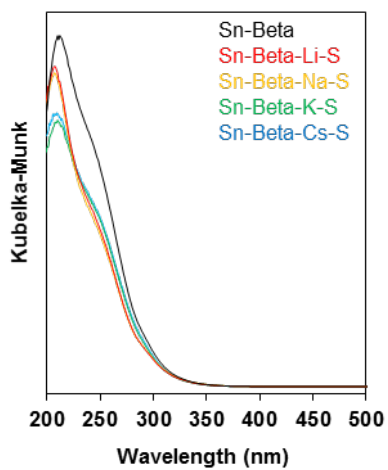

**Fig. S2** UV-Vis spectra of wet Sn-Beta samples.

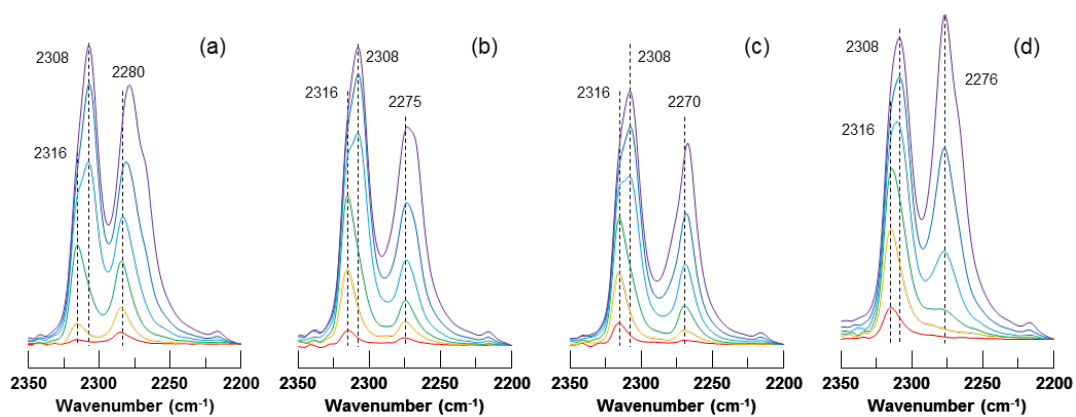

**Fig. S3** IR spectra of CD<sub>3</sub>CN molecules adsorbed on (a) Sn-Beta-Na-S, (b) Sn-Beta-K-S, (c) Sn-Beta-Cs-S, and (d) Sn-Beta-H<sub>2</sub>O. From bottom (red) to top (purple), CD<sub>3</sub>CN pressure was increased from 5 to 200 Pa.

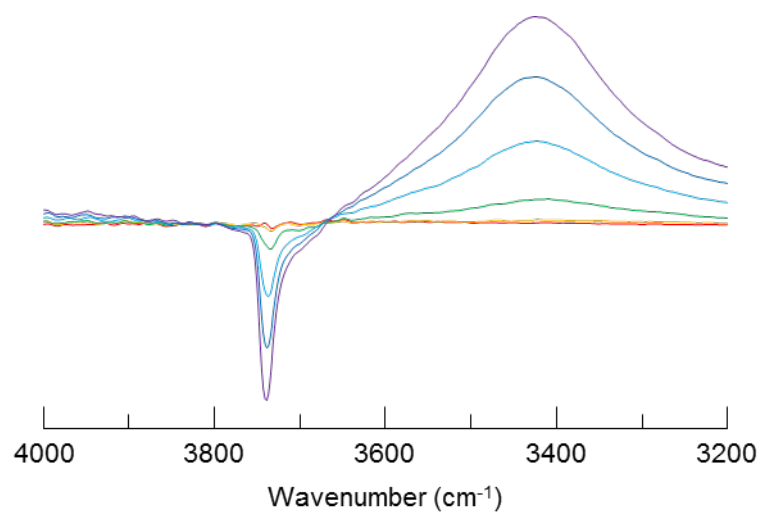

**Fig. S4** OH-region difference IR spectra of Sn-Beta before and after adsorption of CD<sub>3</sub>CN. From bottom (red) to top (purple), CD<sub>3</sub>CN pressure was increased from 5 to 200 Pa.

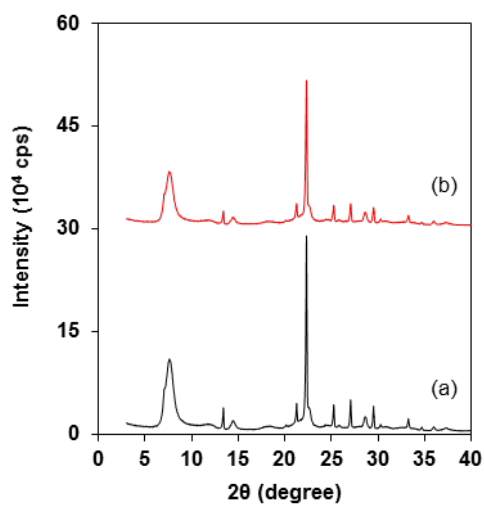

**Fig. S5** XRD patterns of (a) Sn-Beta and (b) Sn-Beta-H<sub>2</sub>O.

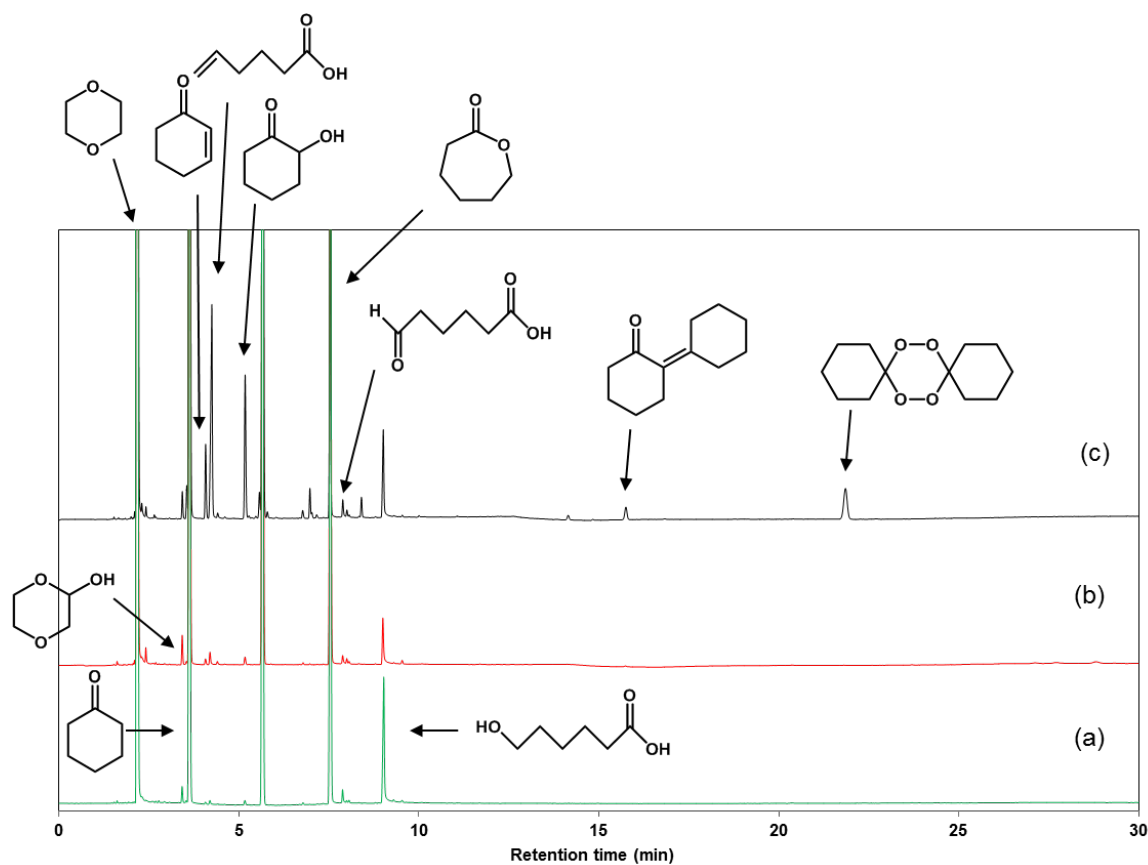

**Fig. S6** Gas chromatograms for the BV oxidation of cyclohexanone with (a) Sn-Beta-Na-S, (b) Sn-Beta, and (c) Al-Beta.

Reaction conditions: catalyst, 50 mg; cyclohexanone, 3 mmol; H<sub>2</sub>O<sub>2</sub> (35 wt.%) 3 mmol; 1,4-dioxane, 8.5 ml; temperature, 90 °C; reaction time, 2 h (for Al-Beta, 1 h).

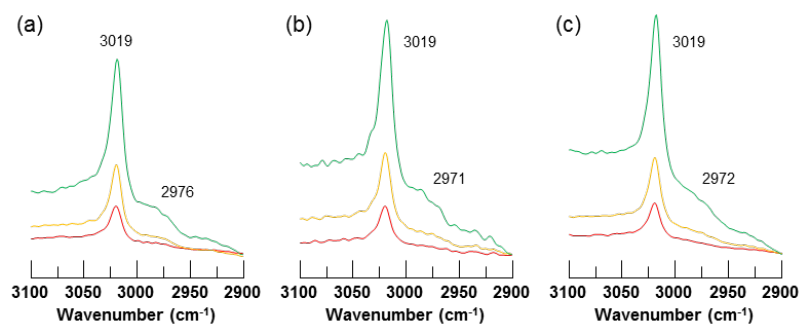

**Fig. S7** IR spectra of  $\text{CHCl}_3$  molecules adsorbed on (a) Sn-Beta-Na-S, (b) Sn-Beta-K-S, and (c) Sn-Beta-Cs-S. From bottom (red) to top (green),  $\text{CD}_3\text{CN}$  pressure was increased from 50 to 200 Pa.
